# Supplementary material for: PINK1-PTEN axis promotes metastasis and chemoresistance in ovarian cancer via non-canonical pathway
Source: PubMed Central journal article supplement (PMC10633943; doi:10.1186/s13046-023-02823-w), 2023-11-09
Supplement: 13046_2023_2823_MOESM2_ESM.pdf [file 13046_2023_2823_MOESM2_ESM.pdf]

**Table S1. The detailed antibody information**

| <b>Antibodies</b>                                             | <b>Source</b>             | <b>Cat#</b> |
|---------------------------------------------------------------|---------------------------|-------------|
| Anti-GAPDH                                                    | Cell signaling Technology | #5174       |
| Anti-PINK1                                                    | Cell signaling Technology | #6946       |
| Anti-PTEN                                                     | Cell signaling Technology | #9599       |
| Anti-PTEN                                                     | proteintech               | 60300-1-Ig  |
| Anti-Parkin                                                   | Cell signaling Technology | #32833      |
| Anti-Claudin-1                                                | Cell signaling Technology | #13255      |
| Anti-E-cadherin                                               | Cell signaling Technology | #14472      |
| Anti-N-cadherin                                               | Cell signaling Technology | #13116      |
| Anti-Vimentin                                                 | Cell signaling Technology | #5741       |
| Anti-slug                                                     | Cell signaling Technology | #9585       |
| Anti-snail                                                    | Cell signaling Technology | #3879       |
| Anti-Lamin A/C                                                | Cell signaling Technology | #4777       |
| Anti- Phospho-AKT Thr308                                      | Cell signaling Technology | #13038      |
| Anti- Phospho-AKT Ser473                                      | Cell signaling Technology | #4060       |
| Anti-AKT                                                      | Beyotime                  | AF1789      |
| Anti- pan Phospho-Serine/Threonine Rabbit Polyclonal Antibody | Beyotime                  | AF5725      |
| Anti-HA                                                       | Cell signaling Technology | #3724       |
| Anti-Flag                                                     | Cell signaling Technology | #14793      |
| Anti-Ubiquitin                                                | Beyotime                  | AF1704      |
| Anti-CA125                                                    | Abcam                     | ab110640    |
| Anti-Ki67                                                     | Beyotime                  | AF1738      |
| Anti-LDHA                                                     | Beyotime                  | AF0216      |

**Table S2. Primers and sequences**

| <b>Primers for PCR and real time PCR</b> |                                                             |                                                             |
|------------------------------------------|-------------------------------------------------------------|-------------------------------------------------------------|
| Primers                                  | Sequences-F (5' → 3')                                       | Sequences-R (5' → 3')                                       |
| PINK1                                    | ACCTTTGCCCTAACACGAG                                         | AACTGAACGTGCTGACCCAT                                        |
| PTEN                                     | ACCAGGACCAGAGGAAACCT                                        | GCTAGCCTCTGGATTTGACG                                        |
| GAPDH                                    | AGGTCGGTGTGAACGGATTTG                                       | GGGGTCGTTGATGGCAACA                                         |
| <b>Sequences for gene knockdown</b>      |                                                             |                                                             |
| si-PINK1-1                               | GGAGCCAUCGCCUAUGAAATT                                       | UUUCAUAGGCGAUGGCUCCTT                                       |
| si-PINK1-2                               | GCAA AUGUGCUUCAUCAATT                                       | UUAGAUGAAGCACAUUUGCTT                                       |
| si-PINK1-3                               | GCUAACCUGGAGUGUGAAATT                                       | UUUCACACUCCAGGUUAGCTT                                       |
| si-NC                                    | UUCUCCGAACGUGUCACGUTT                                       | ACGUGACACGUUCGGAGAATT                                       |
| sh-PINK1                                 | CACCGCTGGAGGAGTATCTGATAGGTTCA<br>AGAGACCTATCAGATACTCCTCCAGC | AAAAGCTGGAGGAGTATCTGATAGGTCTCT<br>TGAACCTATCAGATACTCCTCCAGC |

**Table S3 Detailed information of included datasets from the Kaplan-Meier Plotter**

| Dataset  | Included number | Histology    |        |        | Stage |    |     |    | Geographic location | Publication year |
|----------|-----------------|--------------|--------|--------|-------|----|-----|----|---------------------|------------------|
|          |                 | Endometrioid | Serous | Others | I     | II | III | IV |                     |                  |
| GSE27651 | 39              | /            | /      | /      | 7     | 1  | 28  | 3  | USA                 | 2011             |
| GSE26712 | 185             | /            | /      | /      | /     | /  | /   | /  | USA                 | 2011             |
| GSE15622 | 35              | 0            | 31     | 4      | 0     | 0  | 26  | 9  | Switzerland         | 2009             |
| GSE30161 | 58              | 1            | 47     | 10     | 0     | 0  | 53  | 5  | USA                 | 2012             |
| GSE19829 | 28              | /            | /      | /      | /     | /  | /   | /  | USA                 | 2010             |
| GSE63885 | 75              | 1            | 70     | 4      | 0     | 2  | 63  | 10 | Poland              | 2014             |
| GSE3149  | 115             | /            | /      | /      | 0     | 1  | 95  | 19 | USA                 | 2005             |
| GSE18520 | 53              | 0            | 53     | 0      | /     | /  | /   | /  | USA                 | 2009             |
| TCGA     | 557             | 0            | 557    | 0      | 15    | 27 | 427 | 85 | USA                 | /                |
| GSE14764 | 80              | 7            | 68     | 5      | 8     | 1  | 69  | 2  | Germany             | 2009             |
| GSE26193 | 107             | 8            | 79     | 20     | 20    | 11 | 59  | 17 | France              | 2011             |
| GSE9891  | 285             | 20           | 264    | 1      | 24    | 18 | 217 | 22 | Australia           | 2008             |

**Table S4. The detailed mass spectrometry information for peptidegroup**

| Sequence                                 | Positions in Master Proteins | Modifications in Master Proteins | Theo. MH+ [Da] | Abundances  | Confidence | m/z [Da]  | DeltaM [ppm] |
|------------------------------------------|------------------------------|----------------------------------|----------------|-------------|------------|-----------|--------------|
| AGKGRTGVMICAYLLHRGK                      | sp [126-144]                 |                                  | 2104.12664     |             | High       | 351.52991 | 7.8          |
| RYVYYYSYLLKNHLDYRPVALLFHK                | sp [173-197]                 | sp 2xPhospho [Y174; S179]        | 3394.65778     | 88306.92969 | High       | 566.60986 | -10.31       |
| RYQEDGFDLDTYIYPNIIAMGFPAERLEGVYRNNIDDVVR | sp [15-55]                   | sp 1xPhospho [Y46]               | 4930.35461     | 38106.51953 | High       | 986.8645  | -12.41       |
| RYQEDGFDLDTYIYPNIIAMGFPAERLEGVYR         | sp [15-47]                   | sp 1xPhospho [Y46]               | 4020.88778     | 106410.75   | High       | 804.98291 | -0.58        |
| NNIDDVVR                                 | sp [48-55]                   |                                  | 944.47958      | 5183542     | High       | 472.74438 | 2.02         |
| NHLDYRPVALLFHKMMFETIPMFSGGTCNPQFVVCQLK   | sp [184-221]                 |                                  | 4558.20009     |             | High       | 760.53979 | 0.5          |
| MTAIK                                    | sp [1-6]                     |                                  | 676.40621      | 351535.7031 | High       | 676.40698 | 1.14         |
| IYSSNSGPTR                               | sp [224-233]                 |                                  | 1081.52726     | 6495780.5   | High       | 541.26837 | 2.04         |
| VEFFHK                                   | sp [255-260]                 |                                  | 806.41955      | 2258414.672 | High       | 403.71445 | 2.56         |
| LEGVYRNNIDDVVRFLDSK                      | sp [42-60]                   |                                  | 2252.16697     |             | High       | 451.24548 | 13.92        |
| KGVTIPSQR                                | sp [164-172]                 |                                  | 985.5789       | 309714.5313 | High       | 493.29486 | 3.59         |
| HYDTAK                                   | sp [75-80]                   |                                  | 734.34678      |             | High       | 734.34204 | -6.45        |
| GRTGVMICAYLLHRGKFLK                      | sp [129-147]                 |                                  | 2236.22054     | 263041      | High       | 448.04703 | -6.49        |
| GRTGVMICAYLLHRGK                         | sp [129-144]                 |                                  | 1847.9731      | 818893.25   | High       | 616.6615  | -1.71        |
| FLDSKHKNHYKIYNLCAER                      | sp [56-74]                   |                                  | 2436.22411     |             | High       | 406.8728  | -9.72        |
| EYLVLTLTKNLDLKANK                        | sp [314-330]                 | sp 1xPhospho [T321]              | 2058.05186     |             | High       | 412.42148 | 12.84        |
| AQEALDFYGEVR                             | sp [148-159]                 |                                  | 1397.66957     | 780159.75   | High       | 699.34192 | 5            |
| LEGVYR                                   | sp [42-47]                   |                                  | 736.39882      | 8136344.688 | High       | 368.7037  | 1.79         |
| YFSPNFK                                  | sp [336-342]                 |                                  | 902.44068      | 4122346.25  | High       | 451.72641 | 5.39         |
